# Supplementary material for: Pathogens and Elicitors Induce Local and Systemic Changes in Triacylglycerol Metabolism in Roots and in Leaves of Arabidopsis thaliana
Source: MDPI journal article supplement (doi:10.3390/biology10090920), 2021-09-16
Supplement: s1 [file s1]

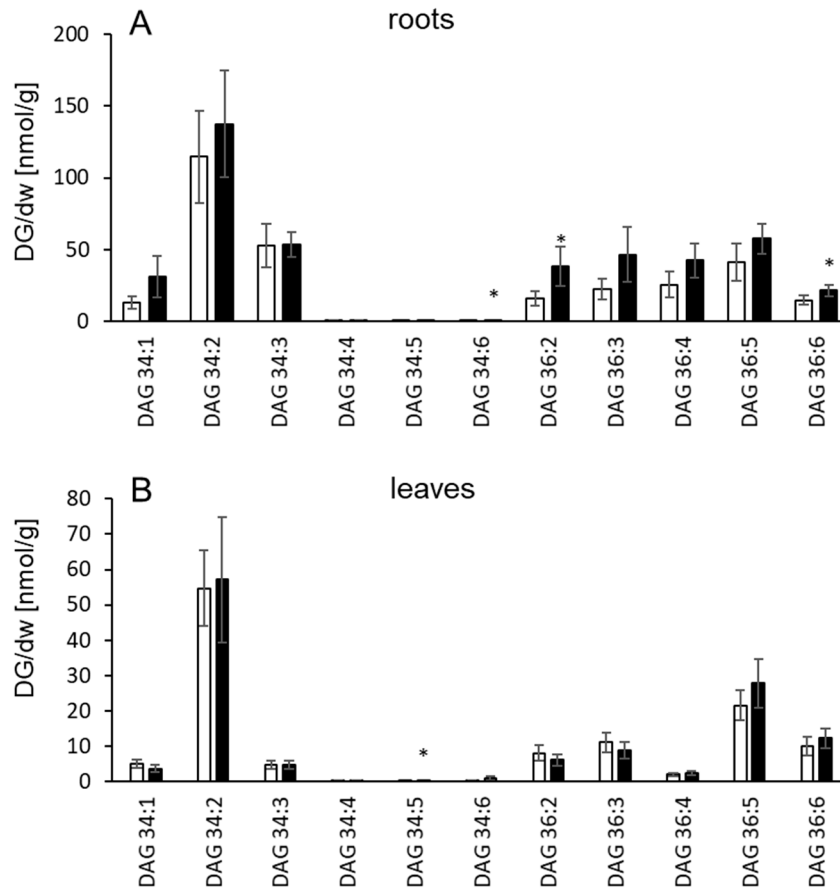

**Supplementary Figure S1.** Levels of different DG species in Col-0 roots (**A**) and leaves (**B**) 3 d after treatment of roots with *V.l.* (black bars) or mock (white bars). DG species are characterized by their total number of acyl carbons and the number of double bonds. DG levels [nmol/g dry weight] shown represent the mean of 5 biological replicates  $\pm$  sd. Asterisks indicate significant differences of the *V.l.* treated samples compared to the corresponding mock treated sample (\*  $p < 0.05$ ).

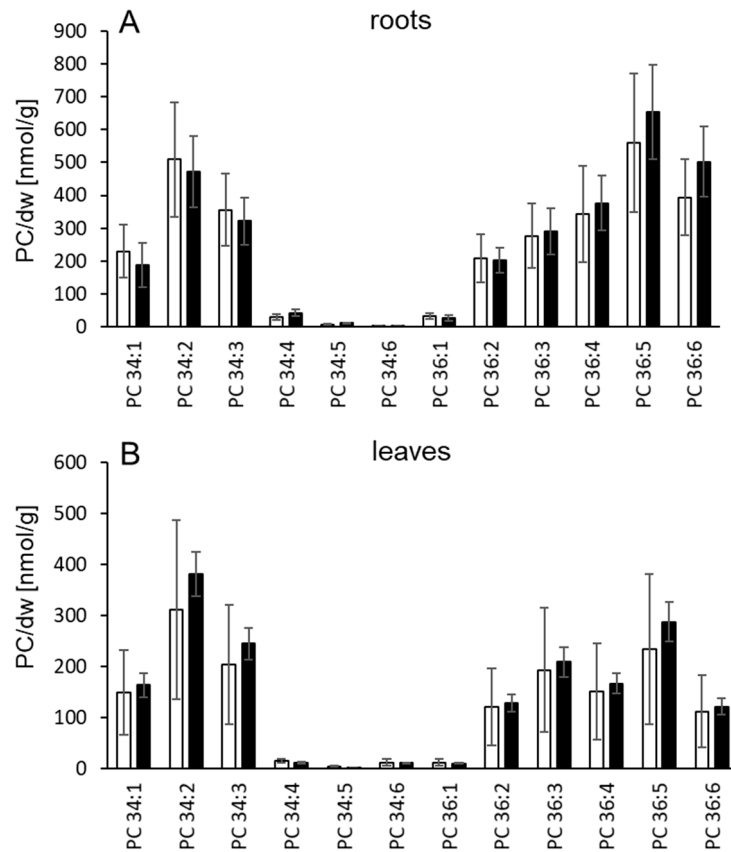

**Supplementary Figure S2.** Levels of different PC species in Col-0 roots (**A**) and leaves (**B**) 3 d after treatment of roots with *V.l.* (black bars) or mock (white bars). PC species are characterized by their total number of acyl carbons and the number of double bonds. PC levels [nmol/g dry weight] shown represent the mean of 5 biological replicates  $\pm$  sd. No significant differences of the *V.l.* treated samples compared to the corresponding mock treated sample were detected.

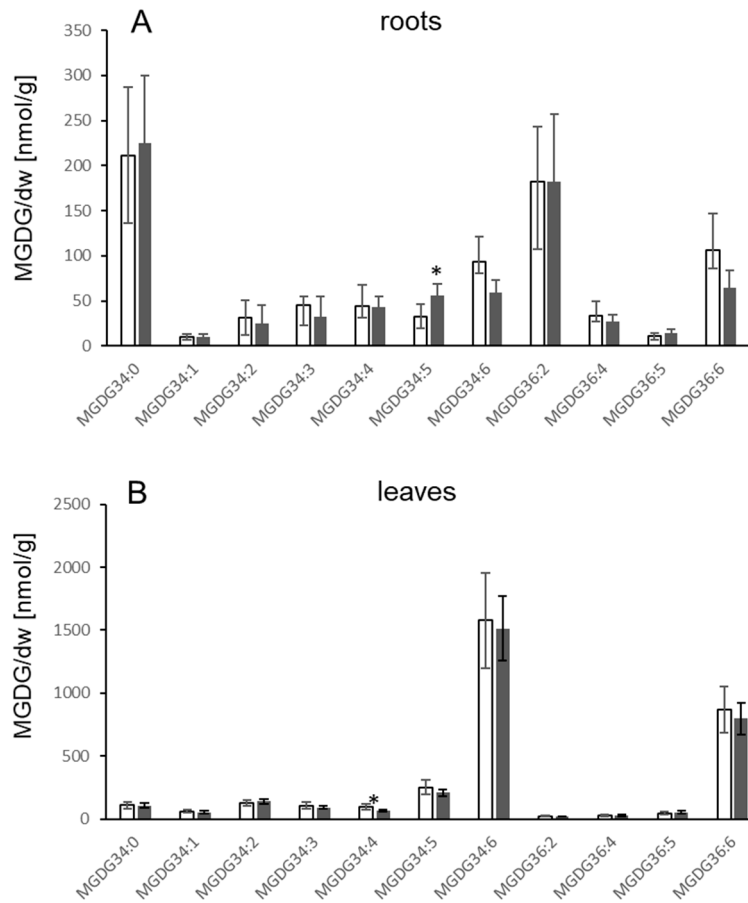

**Supplementary Figure S3.** Levels of different MGDG species in Col-0 roots (**A**) and leaves (**B**) 3 d after treatment of roots with *V.l.* (dark grey bars) or mock (white bars). MGDG species are characterized by their total number of acyl carbons and the number of double bonds. MGDG levels [nmol/g dry weight] shown represent the mean of 5 biological replicates  $\pm$  sd. Asterisks indicate significant differences of the *V.l.* treated samples compared to the corresponding mock treated sample (\*  $p < 0.05$ ).

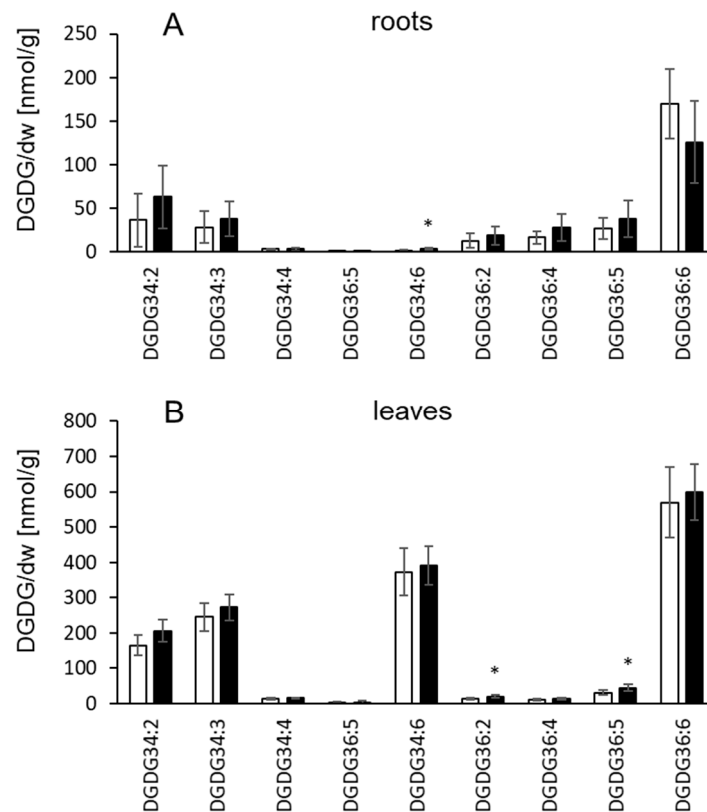

**Supplementary Figure S4.** Levels of different DGDG species in Col-0 roots (**A**) and leaves (**B**) 3 d after treatment of roots with *V.l.* (black bars) or mock (white bars). DGDG species are characterized by their total number of acyl carbons and the number of double bonds. DGDG levels [nmol/g dry weight] shown represent the mean of 5 biological replicates  $\pm$  sd. Asterisks indicate significant differences of the *V.l.* treated samples compared to the corresponding mock treated sample (\*  $p < 0.05$ ).

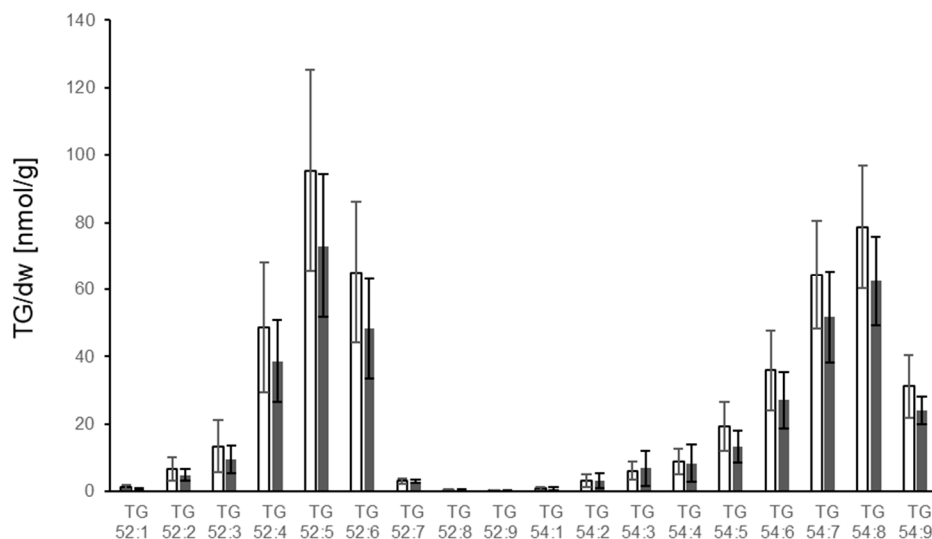

**Supplementary Figure S5.** Levels of different TG species in Col-0 roots 1 d after spraying of leaves with *P. syringae* (dark grey bars) or mock (white bars). TG species are characterized by their total number of acyl carbons and the number of double bonds. TG levels [nmol/g dry weight] shown represent the mean of 5 biological replicates  $\pm$  sd. No significant differences of the *P. syringae* treated samples compared to the corresponding mock treated sample were detected.

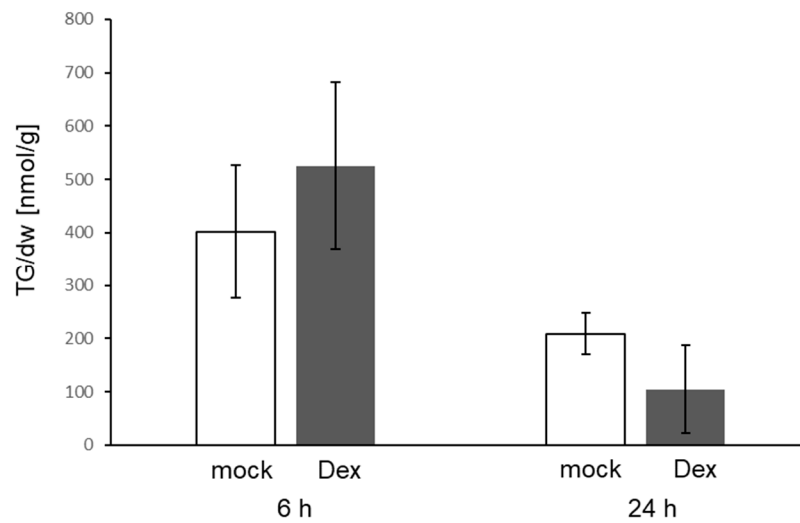

**Supplementary Figure S6.** TGs levels of Col-0 roots 6 h and 24 h after spraying of leaves with dexamethasone to induce expression of AVRRPMI (Dex, dark grey bars) or mock (white bars). Shown is the mean of at least 4 biological replicates  $\pm$  sd of the sum of TGs [nmol/g dry weight] with 52 and 54 acyl carbon atoms and 1 to 9 double bonds. No significant differences of the dexamethasone treated samples compared to the corresponding mock treated sample were detected.

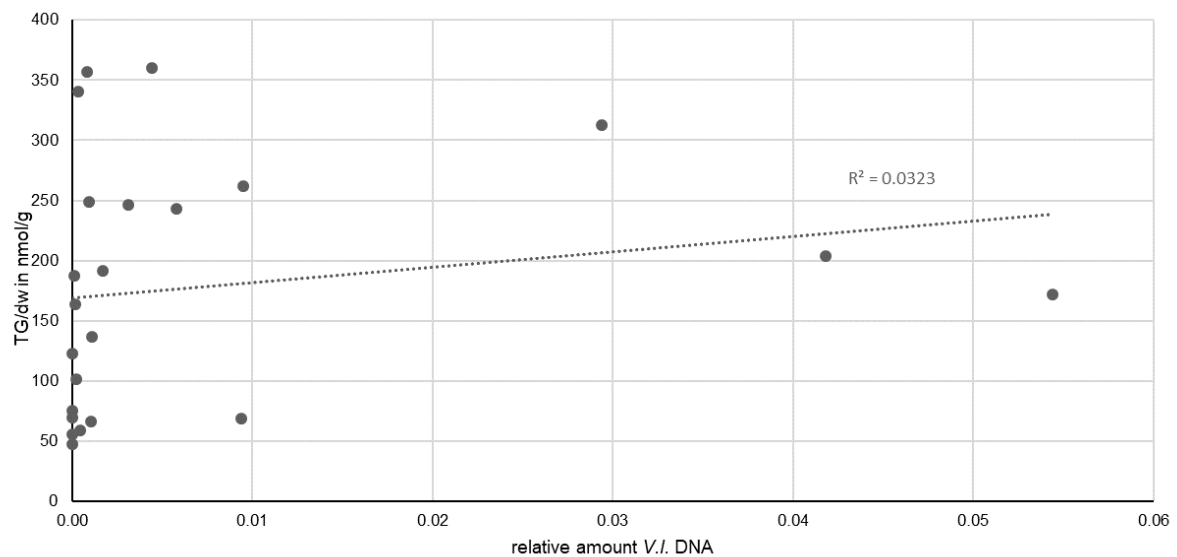

**Supplementary Figure S7.** Linear regression analysis for TG levels and the relative amount of *V.l.* DNA in leaves 1 to 5 d after *V.l.* treatment of roots. R<sup>2</sup>: coefficient of determination. The analysis is based on the data shown in SupplementaryTable S1.

**Supplementary Table S1.** Analysis of TG levels and relative *V.l.* DNA levels in leaves of single plants at time points 1 d to 5 d.

|                      | <b>TG</b>   | <b><i>V.l.</i> DNA</b> | <b><i>V.l.</i> DNA</b> | <b>t-Test</b>     |
|----------------------|-------------|------------------------|------------------------|-------------------|
| Sample               | [nmol/g dw] | relative amount        | mean                   | difference to 1 d |
| leaf <i>V.l.</i> 1 d | 56          | 0.00000                | 0.00037                |                   |
|                      | 59          | 0.00042                |                        |                   |
|                      | 47          | 0.00000                |                        |                   |
|                      | 67          | 0.00106                |                        |                   |
| leaf <i>V.l.</i> 2 d | 76          | 0.00000                | 0.00234                | 0.435             |
|                      | 123         | 0.00000                |                        |                   |
|                      | 69          | 0.00936                |                        |                   |
|                      | 70          | 0.00000                |                        |                   |
| leaf <i>V.l.</i> 3 d | 164         | 0.00014                | 0.00065                | 0.516             |
|                      | 136         | 0.00108                |                        |                   |
|                      | 102         | 0.00024                |                        |                   |
|                      | 188         | 0.00013                |                        |                   |
|                      | 191         | 0.00167                |                        |                   |
| leaf <i>V.l.</i> 4 d | 204         | 0.04181                | 0.02265                | 0.107             |
|                      | 172         | 0.05441                |                        |                   |
|                      | 262         | 0.00949                |                        |                   |
|                      | 360         | 0.00439                |                        |                   |
|                      | 247         | 0.00313                |                        |                   |
| leaf <i>V.l.</i> 5 d | 341         | 0.00030                | 0.00744                | 0.300             |
|                      | 249         | 0.00090                |                        |                   |
|                      | 313         | 0.02936                |                        |                   |
|                      | 243         | 0.00580                |                        |                   |
|                      | 357         | 0.00084                |                        |                   |

Roots were treated with *V.l.* and leaves were harvested at time points 1 d to 5 d. The amount of *V.l.* DNA is relative to Arabidopsis actin gene determined by qPCR. Included is also the p-value according to Students t-test of the *V.l.* DNA amount of 2 d to 5 d relative to 1 d.
